# Supplementary material for: Aromaticity at position 39 in α‐synuclein: A modulator of amyloid fibril assembly and membrane‐bound conformations
Source: PubMed Central journal article supplement — Protein Sci. 2022 Jun 27;31(7):e4360. doi: 10.1002/pro.4360 (PMC9235065; doi:10.1002/pro.4360), 2022-06-27
Supplement: PRO-31-e4360-s001.pdf [file PRO-31-e4360-s001.pdf]

## Supplementary material

Figure S1

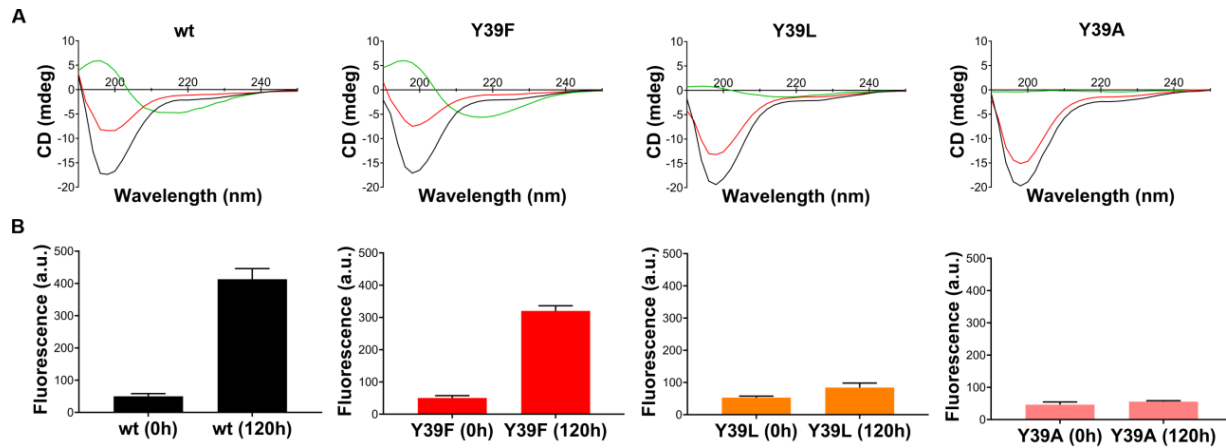

**Figure S1.** Final products of aggregation of  $\alpha$ S and its Y39F, Y39L and Y39A mutants. (A) Far-UV CD spectra corresponding to the supernatant (red) and pellet (green) obtained from the final product of aggregation (t=120h) of the studied  $\alpha$ S species. Black curves correspond to the CD spectra of the monomeric states (t=0h). (A) ThT fluorescence intensities corresponding to the final state of aggregation of the studied  $\alpha$ S species (t=120h) and their monomeric states (t=0h).
